# Supplementary material for: Combined Culture and DNA Metabarcoding Analysis of Cyanobacterial Community Structure in Response to Coral Reef Health Status in the South China Sea
Source: MDPI journal article supplement (doi:10.3390/jmse10121984), 2022-12-13
Supplement: s1 [file s1]

**Tabel S1.** Raw and cleaned sequence information base on universal SSU rDNA primers from Illumina HiSeq run for samples collected from Weizhou island.

| Sample ID | Raw sequence number | Cleaned sequence number | Filtered chimeras sequence number | Number of ASVs | Annotated ASVs number | Cyanobacteria ASVs number | Proportion of cyanobacteria |
|-----------|---------------------|-------------------------|-----------------------------------|----------------|-----------------------|---------------------------|-----------------------------|
| S2-1      | 125847              | 104470                  | 43753                             | 3063           | 1056                  | 47                        | 4.45%                       |
| S2-2      | 134917              | 114863                  | 39347                             | 3214           | 1041                  | 21                        | 2.02%                       |
| S2-3      | 136667              | 115279                  | 56185                             | 3284           | 1402                  | 23                        | 1.64%                       |
| S4-1      | 120404              | 99543                   | 30647                             | 2792           | 888                   | 16                        | 1.80%                       |
| S4-2      | 137914              | 118673                  | 36628                             | 3069           | 1133                  | 107                       | 9.44%                       |
| S4-3      | 117332              | 101961                  | 36149                             | 1766           | 691                   | 5                         | 0.72%                       |
| S6-1      | 136310              | 113267                  | 45839                             | 3124           | 1274                  | 81                        | 6.36%                       |
| S6-2      | 124796              | 100044                  | 42095                             | 2622           | 1199                  | 82                        | 6.84%                       |
| S6-3      | 132730              | 109727                  | 26287                             | 2274           | 892                   | 75                        | 8.41%                       |
| T2-1      | 132306              | 110509                  | 53589                             | 2504           | 1376                  | 77                        | 5.60%                       |
| T2-2      | 135027              | 113895                  | 40385                             | 1907           | 1056                  | 65                        | 6.16%                       |
| T2-3      | 121737              | 101892                  | 36830                             | 2102           | 1077                  | 63                        | 5.85%                       |
| T4-1      | 124860              | 86779                   | 42793                             | 1160           | 869                   | 18                        | 2.07%                       |
| T4-2      | 121054              | 101106                  | 35811                             | 1668           | 955                   | 84                        | 8.80%                       |
| T4-3      | 135890              | 101673                  | 50310                             | 1375           | 986                   | 62                        | 6.29%                       |
| T6-1      | 134161              | 101867                  | 41974                             | 1476           | 854                   | 36                        | 4.22%                       |
| T6-2      | 125434              | 104261                  | 48175                             | 1594           | 1006                  | 74                        | 7.36%                       |
| T6-3      | 126898              | 102484                  | 45000                             | 1683           | 1050                  | 15                        | 1.43%                       |
| W2-1      | 137786              | 116170                  | 34007                             | 2480           | 1156                  | 98                        | 8.48%                       |
| W2-2      | 129018              | 106284                  | 27259                             | 2354           | 1008                  | 96                        | 9.52%                       |
| W2-3      | 136796              | 115191                  | 27826                             | 2587           | 1085                  | 103                       | 9.49%                       |
| W4-1      | 135764              | 115115                  | 42821                             | 1670           | 830                   | 103                       | 12.41%                      |
| W4-2      | 135665              | 115026                  | 43094                             | 1690           | 780                   | 99                        | 12.69%                      |

|      |        |        |       |      |      |     |        |
|------|--------|--------|-------|------|------|-----|--------|
| W4-3 | 121005 | 100965 | 37041 | 1617 | 773  | 100 | 12.94% |
| W6-1 | 137927 | 113384 | 44445 | 2273 | 1161 | 99  | 8.53%  |
| W6-2 | 124311 | 101869 | 34802 | 1899 | 878  | 103 | 11.73% |
| W6-3 | 136646 | 113839 | 44040 | 2160 | 993  | 104 | 10.47% |

**Tabel S2.** Raw and cleaned sequence information base on cyanobacteria-specific SSU rDNA primers from Illumina HiSeq run for samples collected from Weizhou island.

| Sample ID | Raw sequence number | Cleaned sequence number | Filtered chimeras sequence number | Number of ASVs | Annotated ASVs number | Cyanobacteria ASVs number | Proportion of cyanobacteria |
|-----------|---------------------|-------------------------|-----------------------------------|----------------|-----------------------|---------------------------|-----------------------------|
| SBG       | 44374               | 36397                   | 9827                              | 138            | 133                   | 39                        | 29.32%                      |
| SLQ       | 61982               | 54997                   | 10345                             | 156            | 145                   | 50                        | 34.48%                      |
| SSLK      | 44070               | 35696                   | 17614                             | 103            | 100                   | 15                        | 15.00%                      |
| TBG       | 59661               | 45180                   | 16142                             | 148            | 138                   | 24                        | 17.39%                      |
| TLQ       | 41690               | 30826                   | 18735                             | 179            | 174                   | 19                        | 10.92%                      |
| TSLK      | 83848               | 74439                   | 67270                             | 547            | 527                   | 37                        | 7.02%                       |
| WBG       | 56822               | 51219                   | 50395                             | 38             | 37                    | 8                         | 21.62%                      |
| WLQ       | 79424               | 69510                   | 61207                             | 96             | 94                    | 22                        | 23.40%                      |
| WSLK      | 52843               | 46856                   | 40643                             | 21             | 21                    | 13                        | 61.90%                      |
